# Supplementary material for: Handgrip strength and all‐cause dementia incidence and mortality: findings from the UK Biobank prospective cohort study
Source: PubMed Central journal article supplement (PMC9178163; doi:10.1002/jcsm.12857), 2022-04-21
Supplement: JCSM-13-1514-s001.pdf [file JCSM-13-1514-s001.pdf]

## Supplementary Material

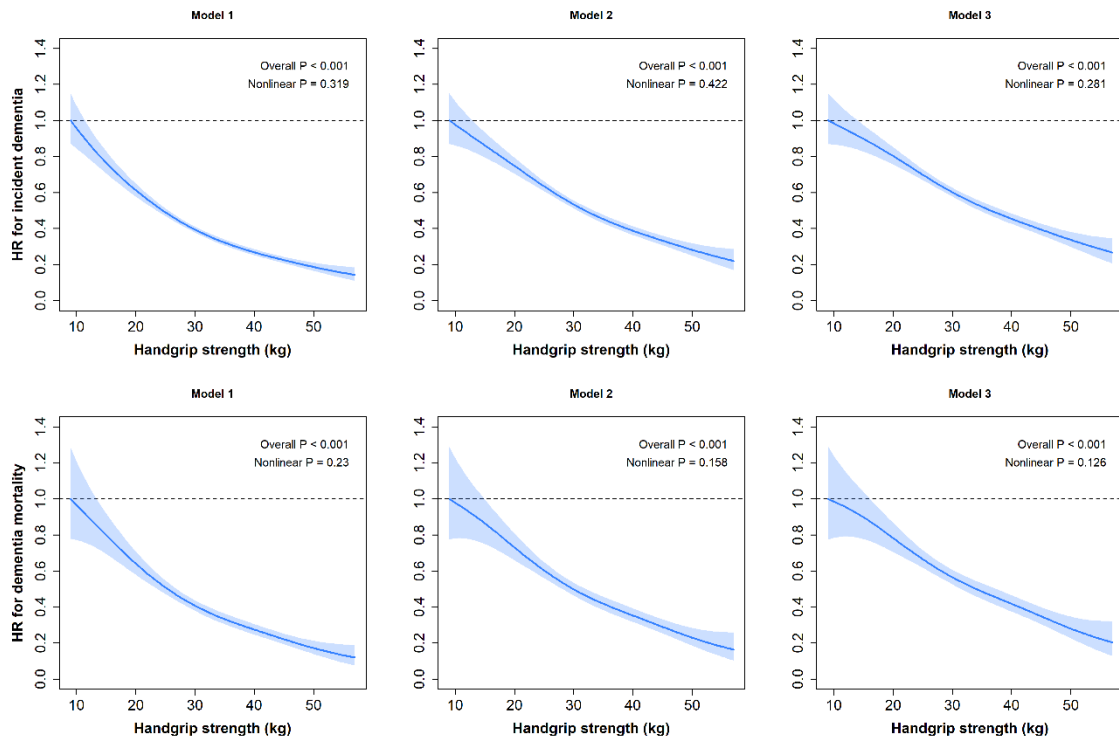

**Appendix Figure S1.** Association of handgrip strength with all-cause dementia incidence (top graphs) and mortality (bottom graphs) with a 4-years landmark analyses.

Data is presented as hazard ratios and their 95% CI. Handgrip strength was expressed in absolute terms. Model 1 was adjusted for age, sex, ethnicity and deprivation index. Model 2 was additionally adjusted for health-related factors including body mass index categories, multimorbidity (prevalent diabetes, hypertension, CVD and cancer) as well as long-standing illness. Model 3 was additionally adjusted by lifestyle behaviors including walking pace, sleep duration, watching TV, smoking and dietary intake (alcohol, fruits and vegetables, red meat, processed meat and oily fish intake).

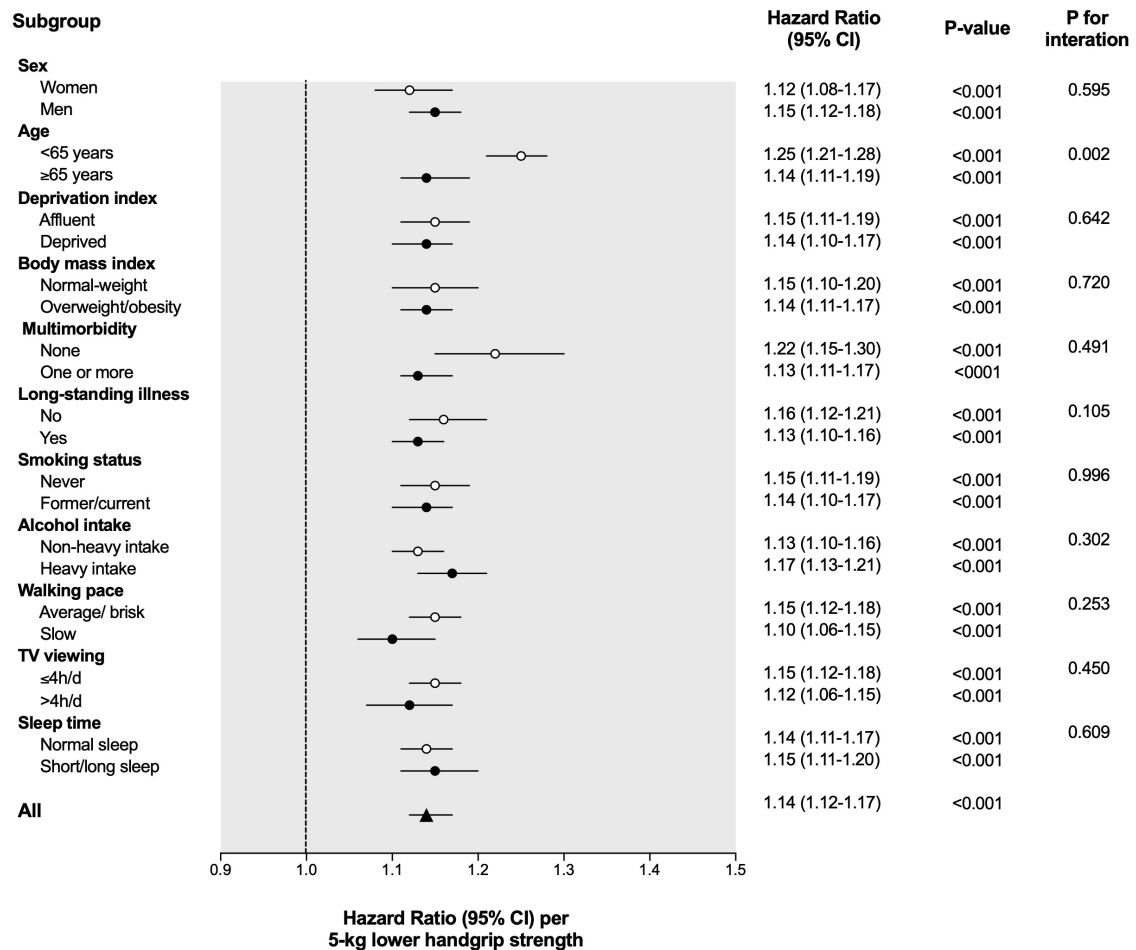

**Appendix Figure S2.** Association between 5-kg lower handgrip strength and incident dementia by sociodemographic, health-related and lifestyle factors.

Data is presented as hazard ratios and 95% CI. All analyses were conducted using a 2-years landmark. Model was adjusted for age, sex, ethnicity, deprivation index, body mass index categories, multimorbidity (prevalent diabetes, hypertension, CVD and cancer) as well as long-standing illness, walking pace, sleep duration, watching TV, smoking and dietary intake (alcohol, fruits and vegetables, red meat, processed meat and oily fish intake), excluding the appropriated grouping variable. Non-heavy intake was defined as drinking alcohol less than twice or one time a week; normal sleep was defined as sleeping 7-9hour/day.

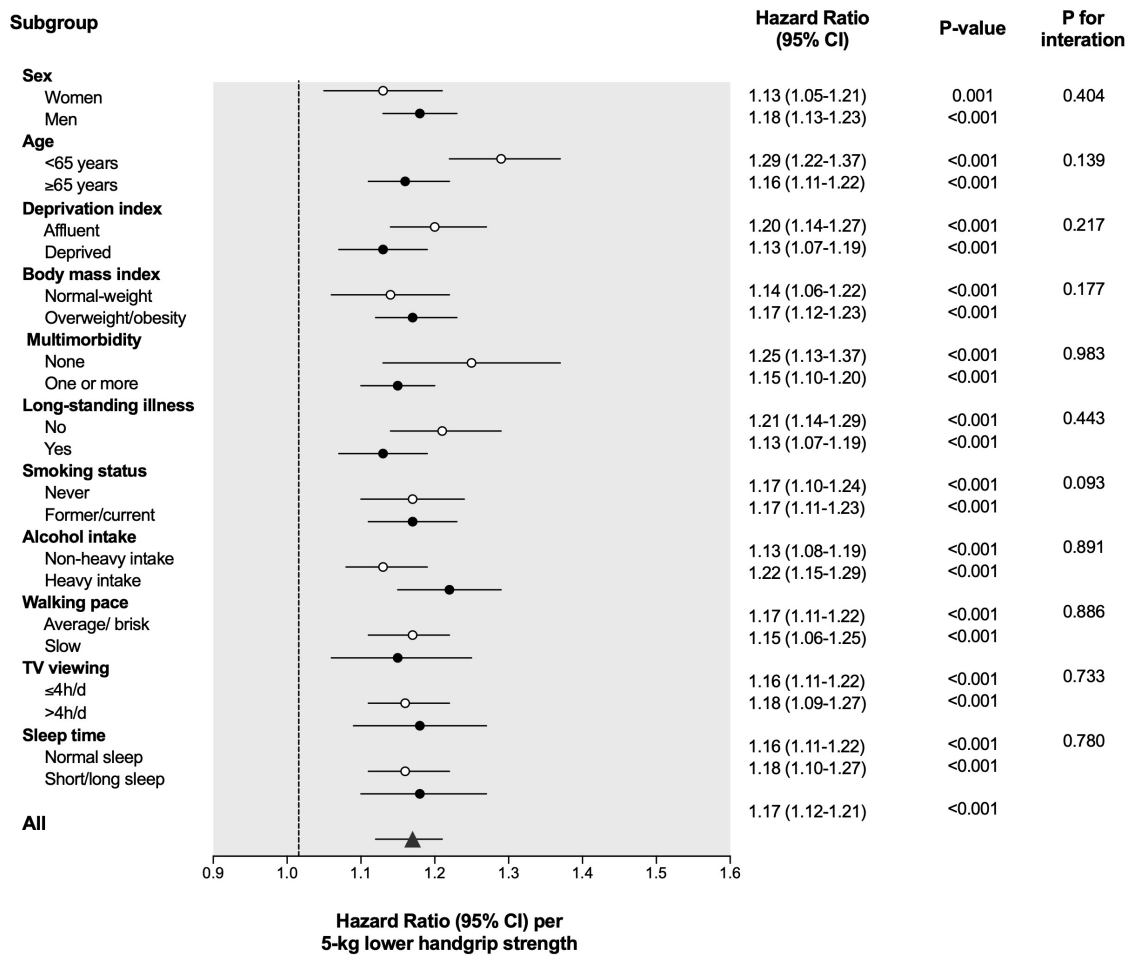

**Appendix Figure S3.** Association between 5-kg lower handgrip strength and dementia mortality by sociodemographic, health-related and lifestyle factors.

Data is presented as hazard ratios and 95% CI. All analyses were conducted using a 2-years landmark. Model was adjusted for age, sex, ethnicity, deprivation index, body mass index categories, multimorbidity (prevalent diabetes, hypertension, CVD and cancer) as well as long-standing illness, walking pace, sleep duration, watching TV, smoking and dietary intake (alcohol, fruits and vegetables, red meat, processed meat and oily fish intake), excluding the appropriated grouping variable. Non-heavy intake was defined as drinking alcohol less than twice or one time a week; normal sleep was defined as sleeping 7-9hour/day.

**Appendix Table S1.** Associations of handgrip strength with incidence and mortality from Alzheimer's and Vascular Dementia.

| <b>Alzheimer incidence</b>         |                  |                        |                        |                        |
|------------------------------------|------------------|------------------------|------------------------|------------------------|
| Quintiles of grip strength         | <i>n</i> /events | Model 1<br>HR (95% CI) | Model 2<br>HR (95% CI) | Model 3<br>HR (95% CI) |
| Q5 (highest)                       | 90145/211        | Ref.                   | Ref.                   | Ref.                   |
| Q4                                 | 87830/257        | 1.22 (1.02; 1.46)      | 1.20 (1.00; 1.43)      | 1.18 (0.98; 1.42)      |
| Q3                                 | 92957/362        | 1.44 (1.21; 1.70)      | 1.39 (1.17; 1.64)      | 1.37 (1.15; 1.62)      |
| Q2                                 | 99096/408        | 1.60 (1.35; 1.88)      | 1.50 (1.27; 1.78)      | 1.47 (1.25; 1.74)      |
| Q1 (lowest)                        | 96679/546        | 2.12 (1.81; 2.49)      | 1.89 (1.61; 2.22)      | 1.81 (1.54; 2.13)      |
| Quintile change                    | 466707/1784      | 1.20 (1.16; 1.24)      | 1.16 (1.12; 1.20)      | 1.15 (1.11; 1.19)      |
| <i>P</i> for trend                 |                  | <0.001                 | <0.001                 | <0.001                 |
| HR per 5kg lower handgrip strength | 466707/1784      | 1.20 (1.16-1.24)       | 1.16 (1.12-1.20)       | 1.14 (1.11-1.18)       |
| <b>Alzheimer mortality</b>         |                  |                        |                        |                        |
| Quintiles of handgrip              | <i>n</i> /events | Model 1<br>HR (95% CI) | Model 2<br>HR (95% CI) | Model 3<br>HR (95% CI) |
| Q5 (highest)                       | 90148/67         | Ref.                   | Ref.                   | Ref.                   |
| Q4                                 | 87841/87         | 1.37 (0.99; 1.88)      | 1.34 (0.98; 1.85)      | 1.33 (0.97; 1.83)      |
| Q3                                 | 92964/96         | 1.30 (0.95; 1.77)      | 1.26 (0.92; 1.72)      | 1.25 (0.91; 1.71)      |
| Q2                                 | 99121/93         | 1.29 (0.94; 1.76)      | 1.24 (0.91; 1.70)      | 1.23 (0.90; 1.67)      |
| Q1 (lowest)                        | 96714/135        | 1.94 (1.45; 2.61)      | 1.86 (1.38; 2.50)      | 1.82 (1.35; 2.46)      |
| Quintile change                    | 466788/478       | 1.14 (1.07; 1.22)      | 1.13 (1.06; 1.21)      | 1.12 (1.05; 1.20)      |
| <i>P</i> for trend                 |                  | <0.001                 | <0.001                 | 0.001                  |
| HR per 5kg lower handgrip strength | 466788/478       | 1.14 (1.07-1.22)       | 1.13 (1.06-1.21)       | 1.12 (1.05-1.20)       |
| <b>Vascular dementia incidence</b> |                  |                        |                        |                        |
| Quintiles of grip strength         | <i>n</i> /events | Model 1<br>HR (95% CI) | Model 2<br>HR (95% CI) | Model 3<br>HR (95% CI) |
| Q5 (highest)                       | 90145/100        | Ref.                   | Ref.                   | Ref.                   |
| Q4                                 | 87830/115        | 1.15 (0.88; 1.50)      | 1.12 (0.85; 1.46)      | 1.09 (0.83; 1.42)      |
| Q3                                 | 92957/185        | 1.56 (1.22; 1.99)      | 1.49 (1.17; 1.90)      | 1.44 (1.13; 1.84)      |
| Q2                                 | 99096/193        | 1.59 (1.25; 2.02)      | 1.44 (1.13; 1.84)      | 1.37 (1.08; 1.75)      |
| Q1 (lowest)                        | 96679/325        | 2.64 (2.11; 3.30)      | 2.09 (1.66; 2.62)      | 1.88 (1.49; 2.37)      |
| Quintile change                    | 466707/918       | 1.27 (1.21; 1.34)      | 1.20 (1.14; 1.26)      | 1.17 (1.11; 1.23)      |
| <i>P</i> for trend                 |                  | <0.001                 | <0.001                 | <0.001                 |
| HR per 5kg lower handgrip strength | 466707/918       | 1.29 (1.23-1.35)       | 1.20 (1.15-1.25)       | 1.17 (1.12-1.22)       |
| <b>Vascular dementia mortality</b> |                  |                        |                        |                        |
| Quintiles of handgrip              | <i>n</i> /events | Model 1<br>HR (95% CI) | Model 2<br>HR (95% CI) | Model 3<br>HR (95% CI) |
| Q5 (highest)                       | 90148/28         | Ref.                   | Ref.                   | Ref.                   |
| Q4                                 | 87841/37         | 1.37 (0.84; 2.25)      | 1.35 (0.82; 2.20)      | 1.30 (0.79; 2.12)      |
| Q3                                 | 92964/50         | 1.60 (1.01; 2.55)      | 1.53 (0.96; 2.44)      | 1.47 (0.93; 2.34)      |
| Q2                                 | 99121/57         | 1.85 (1.17; 2.91)      | 1.68 (1.06; 2.64)      | 1.57 (0.99; 2.48)      |
| Q1 (lowest)                        | 96714/83         | 2.77 (1.80; 4.26)      | 2.22 (1.44; 3.44)      | 1.98 (1.27; 3.08)      |
| Quintile change                    | 466788/255       | 1.27 (1.16; 1.39)      | 1.20 (1.09; 1.32)      | 1.17 (1.06; 1.28)      |
| <i>P</i> for trend                 |                  | <0.001                 | <0.001                 | 0.001                  |
| HR per 5kg lower handgrip strength | 466788/255       | 1.26 (1.16-1.37)       | 1.18 (1.08-1.28)       | 1.14 (1.05-1.24)       |

Data presented as hazard ratio (HR, 95%CI). All analyses were conducted using a 2-years landmark. Model 1 was adjusted for age, sex, ethnicity and deprivation index. Model 2 was additionally adjusted for health-related factors including body mass index categories, multimorbidity (prevalent diabetes, hypertension, CVD and cancer) as well as long-standing illness. Model 3 was additionally adjusted by lifestyle behaviors including walking pace, sleep duration, watching TV, smoking and dietary intake (alcohol, fruits and vegetables, red meat, processed meat and oily fish intake).

**Appendix Table S2.** Hazard ratio (95% CI) for all-cause dementia incidence per 5kg lower handgrip strength stratified by subgroups

|                        | N      | Events | HR   | Lower (95% CI) | Upper (95% CI) | P      | P for interaction |
|------------------------|--------|--------|------|----------------|----------------|--------|-------------------|
| Body mass index        |        |        |      |                |                |        |                   |
| Normal weight          | 153797 | 1220   | 1.15 | 1.10           | 1.20           | <0.001 | 0.752             |
| Overweight             | 198749 | 1717   | 1.15 | 1.11           | 1.19           | <0.001 |                   |
| Obesity                | 111758 | 1119   | 1.12 | 1.08           | 1.17           | <0.001 |                   |
| Smoking status         |        |        |      |                |                |        |                   |
| Never                  | 256839 | 1880   | 1.15 | 1.11           | 1.19           | <0.001 | 0.895             |
| Former                 | 162194 | 1784   | 1.14 | 1.10           | 1.17           | <0.001 |                   |
| Current                | 47674  | 423    | 1.14 | 1.07           | 1.22           | <0.001 |                   |
| Walking pace           |        |        |      |                |                |        |                   |
| Slow pace              | 36097  | 792    | 1.10 | 1.06           | 1.15           | <0.001 | 0.284             |
| Average pace           | 245210 | 2198   | 1.13 | 1.09           | 1.16           | <0.001 |                   |
| Brisk pace             | 185400 | 1097   | 1.20 | 1.14           | 1.25           | <0.001 |                   |
| Sleep time             |        |        |      |                |                |        |                   |
| Normal sleep (7-9 h/d) | 345077 | 2873   | 1.14 | 1.11           | 1.17           | <0.001 | 0.530             |
| Short sleep (<7 h/d)   | 113694 | 1029   | 1.16 | 1.11           | 1.21           | <0.001 |                   |
| Long sleep (>9 h/d)    | 7936   | 185    | 1.12 | 1.02           | 1.23           | 0.022  |                   |

Data presented as hazard ratio (HR, 95%CI). All analyses were conducted using a 2-years landmark. Model was adjusted for age, sex, ethnicity, deprivation index, body mass index categories, multimorbidity (prevalent diabetes, hypertension, CVD and cancer) as well as long-standing illness, walking pace, sleep duration, watching TV, smoking and dietary intake (alcohol, fruits and vegetables, red meat, processed meat and oily fish intake), excluding the appropriated grouping variable.

**Appendix Table S3.** Hazard ratio (95% CI) for all-cause dementia mortality per 5kg lower handgrip strength stratified by subgroups

|                        | N      | Events | HR   | Lower (95% CI) | Upper (95% CI) | P      | P for interaction |
|------------------------|--------|--------|------|----------------|----------------|--------|-------------------|
| <b>Body mass index</b> |        |        |      |                |                |        |                   |
| Normal-weight          | 153823 | 444    | 1.14 | 1.06           | 1.22           | <0.001 | 0.626             |
| Overweight             | 198786 | 558    | 1.20 | 1.13           | 1.27           | <0.001 |                   |
| Obesity                | 111775 | 298    | 1.12 | 1.04           | 1.21           | 0.004  |                   |
| <b>Walking pace</b>    |        |        |      |                |                |        |                   |
| Slow pace              | 36115  | 232    | 1.15 | 1.06           | 1.25           | <0.001 | 0.846             |
| Average pace           | 245255 | 700    | 1.12 | 1.06           | 1.18           | <0.001 |                   |
| Brisk pace             | 185418 | 377    | 1.25 | 1.16           | 1.35           | <0.001 |                   |
| <b>Smoking status</b>  |        |        |      |                |                |        |                   |
| Never                  | 256879 | 575    | 1.17 | 1.10           | 1.24           | <0.001 | 0.035             |
| Former                 | 162225 | 611    | 1.15 | 1.09           | 1.21           | <0.001 |                   |
| Current                | 47684  | 123    | 1.26 | 1.12           | 1.43           | <0.001 |                   |
| <b>Sleep time</b>      |        |        |      |                |                |        |                   |
| Normal sleep (7-9 h/d) | 345140 | 958    | 1.16 | 1.11           | 1.22           | <0.001 | 0.886             |
| Short sleep (<7 h/d)   | 113707 | 284    | 1.19 | 1.09           | 1.29           | <0.001 |                   |
| Long sleep (>9 h/d)    | 7941   | 67     | 1.15 | 0.98           | 1.35           | 0.083  |                   |

Data presented as hazard ratio (HR, 95%CI). All analyses were conducted using a 2-years landmark. Model was adjusted for age, sex, ethnicity, deprivation index, body mass index categories, multimorbidity (prevalent diabetes, hypertension, CVD and cancer) as well as long-standing illness, walking pace, sleep duration, watching TV, smoking and dietary intake (alcohol, fruits and vegetables, red meat, processed meat and oily fish intake), excluding the appropriated grouping variable.
